# Supplementary material
Source: bioRxiv or medRxiv preprint supplement (https://www.biorxiv.org/highwire/filestream/40704/field_highwire_adjunct_files/0/138222-1.pdf)

**A**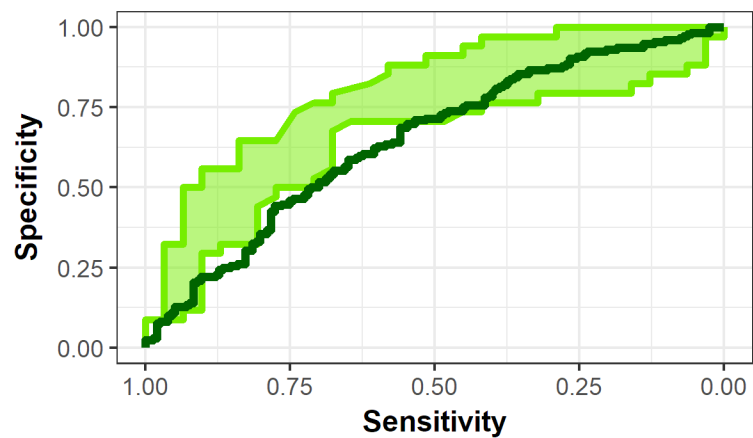**B**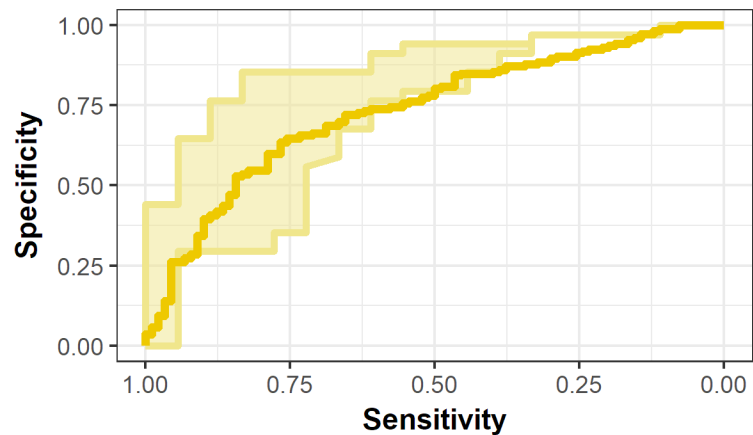**C**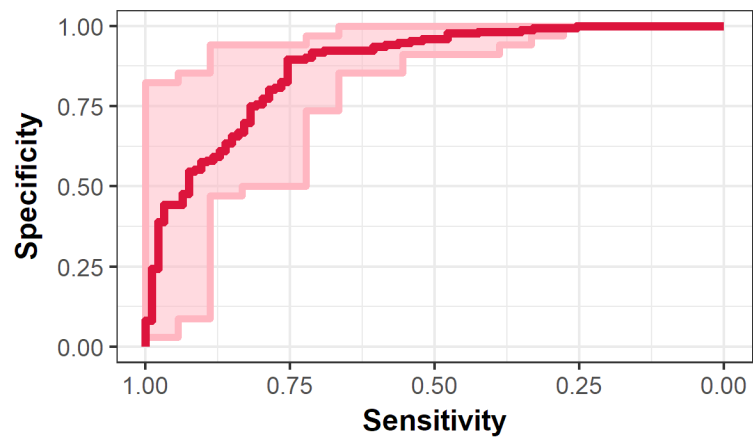

Supplement: Supplementary file [file 138222-1.pdf]
